# Supplementary material for: Production and Characterization of Fengycin by Indigenous Bacillus subtilis F29-3 Originating from a Potato Farm
Source: PubMed Central journal article supplement (PMC3000098; doi:10.3390/ijms11114526), 2010-11-12

**Figure S1.** (a) Infrared spectrum for fengycin product obtained in this work; (b) Infrared spectrum of fengycin from literature [15].

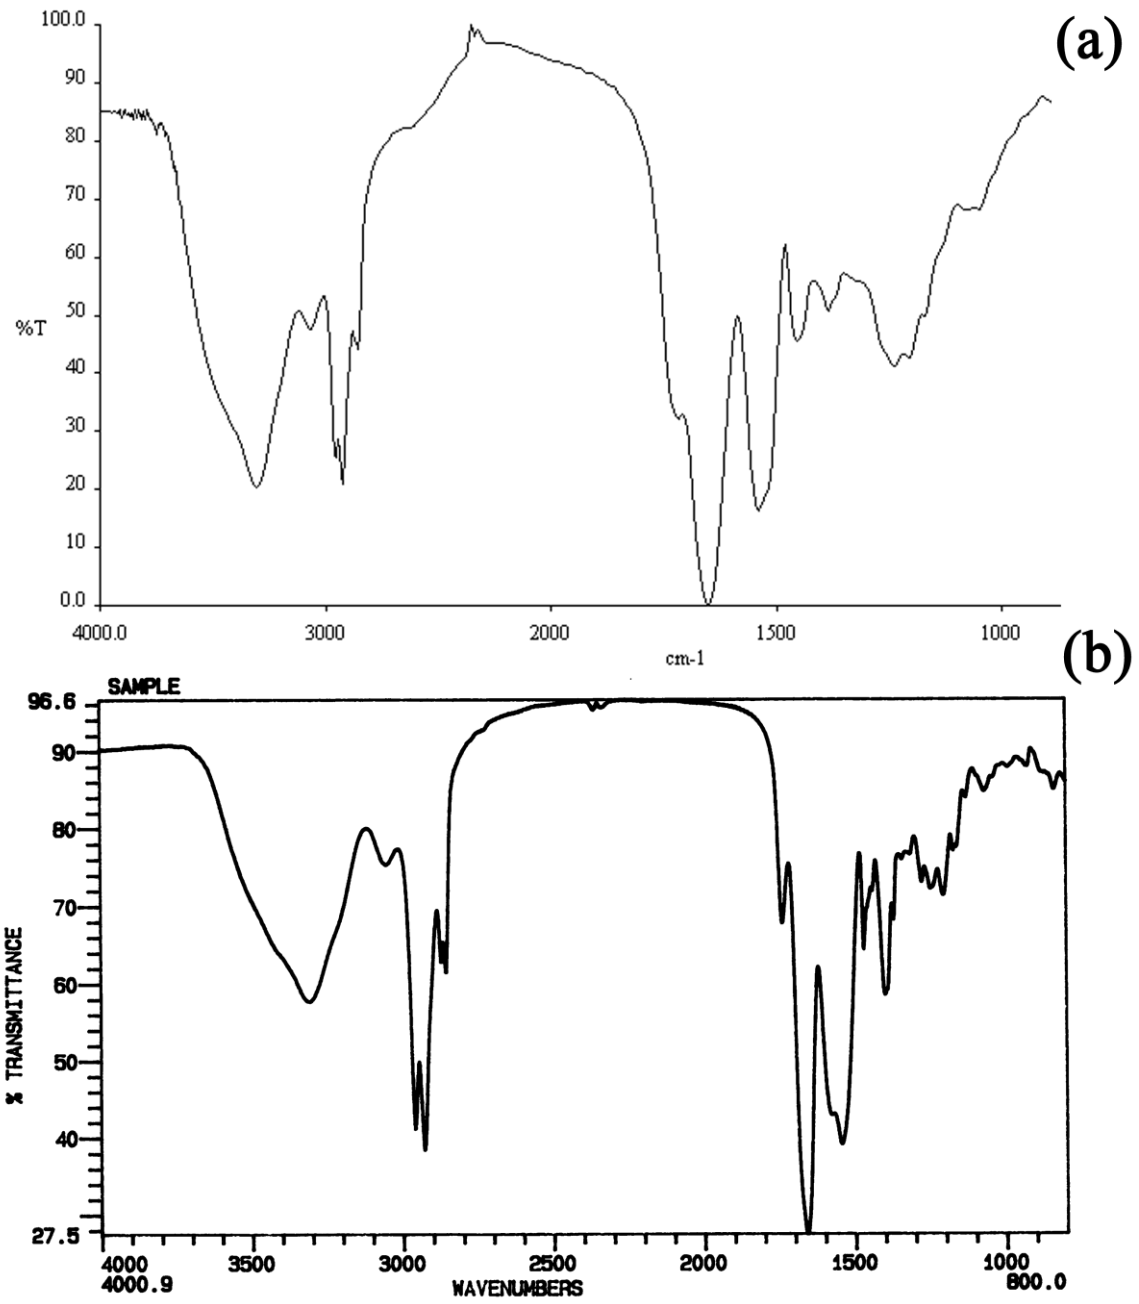

**Figure S2.** (a)  $^{13}\text{C}$ -NMR spectrum for fengycin product obtained in this work; (b)  $^{13}\text{C}$ -NMR spectrum of fengycin from literature [14]; (c)  $^{13}\text{C}$ -NMR spectrum for fengycin product obtained in this work; (d)  $^{13}\text{C}$ -NMR spectrum of fengycin from literature [14]

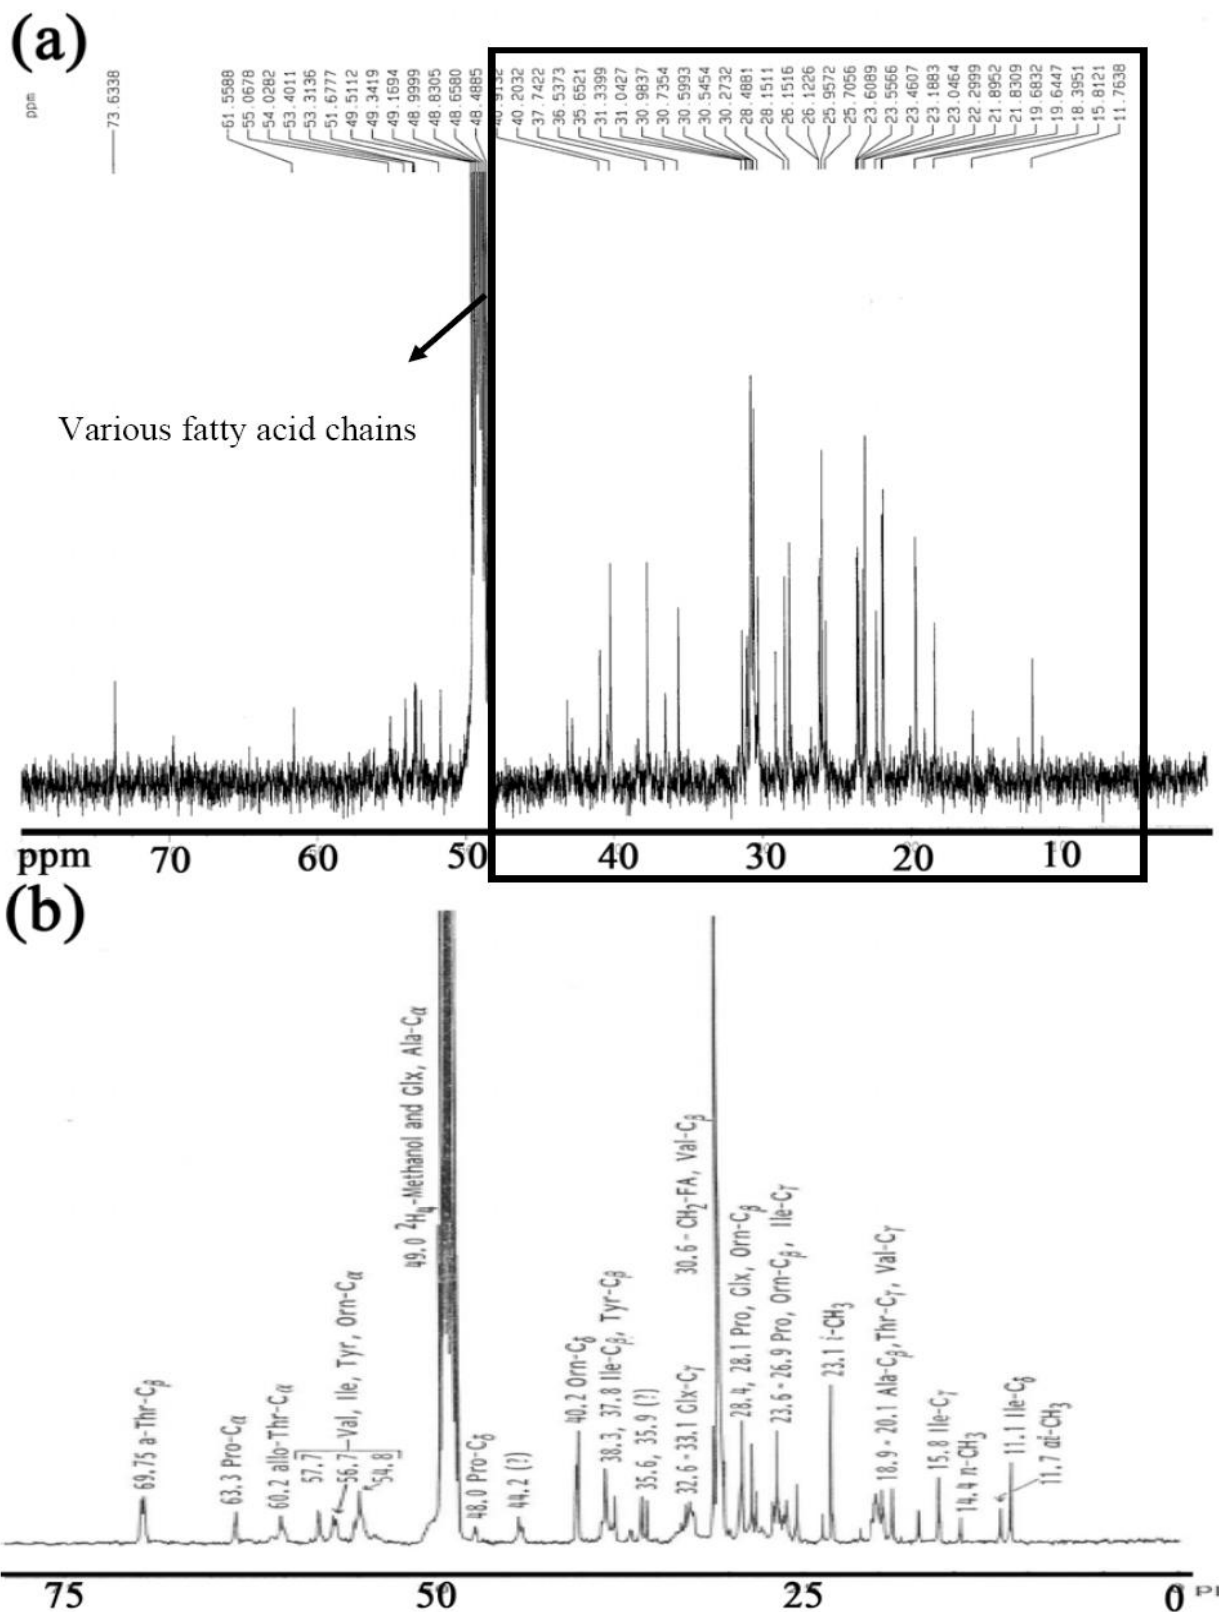

Figure S2. Cont.

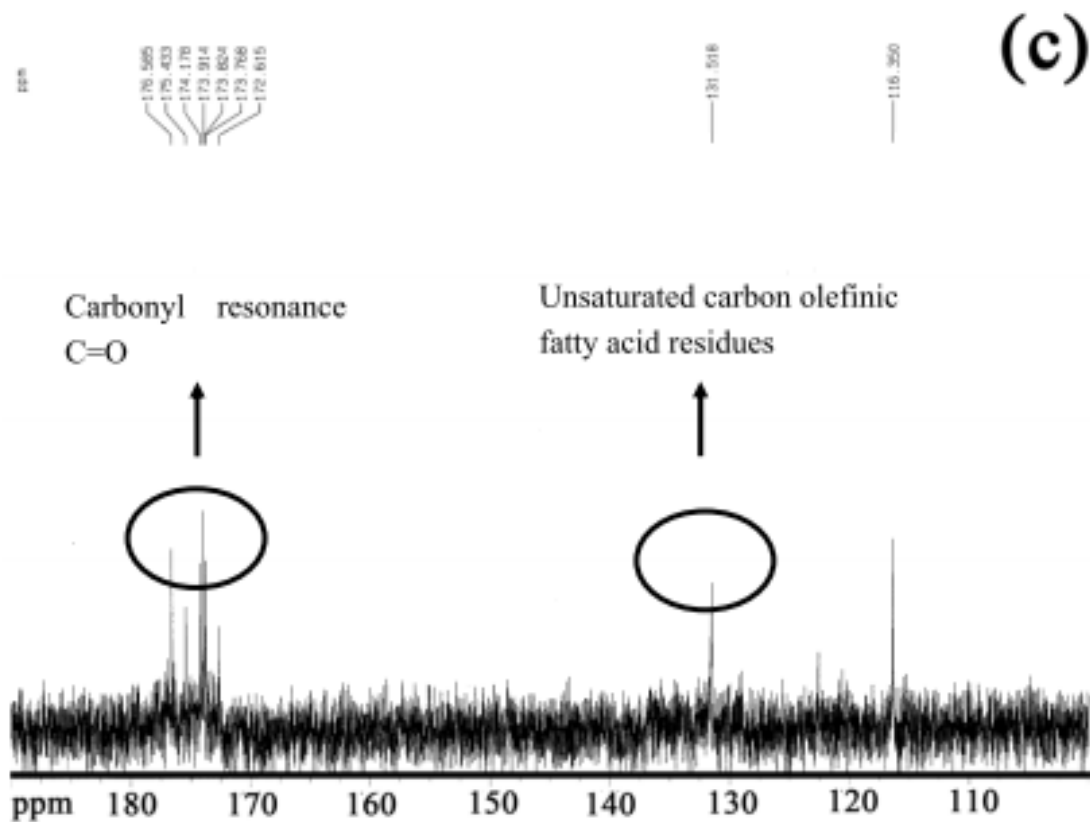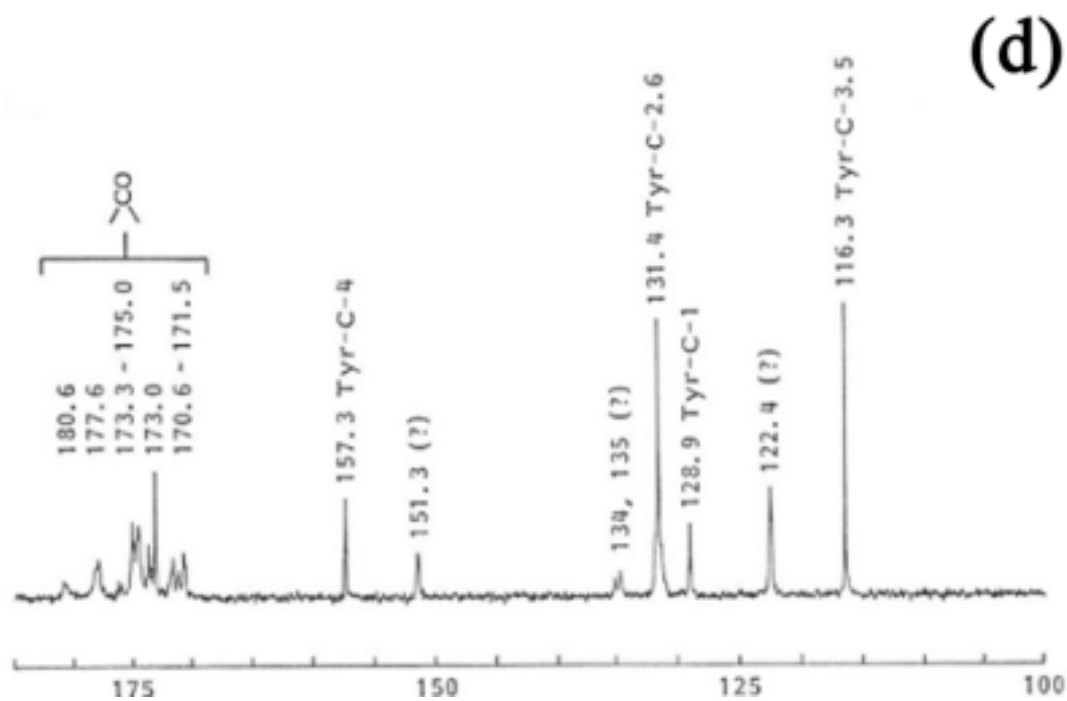

Supplement: ijms-11-04526-s001.pdf [file ijms-11-04526-s001.pdf]
